# Supplementary material for: Bright blue emissions with temperature-dependent quantum yields from microporous metal–organic frameworks
Source: Royal Society of Chemistry journal article supplement (doi:10.1039/c1cc15138j), 2011-11-10
Supplement: c1cc15138j.pdf [file c1cc15138j.pdf]

## Supplementary Information

# Bright Blue Emissions with Temperature-Dependent Quantum Yields from Microporous Metal-Organic Frameworks

Qilong Zhu,<sup>a,b</sup> Chaojun Shen,<sup>a,b</sup> Chunhong Tan,<sup>a,b</sup> Tianlu Sheng,<sup>a</sup> Shengmin Hu<sup>a</sup> and  
Xintao Wu<sup>\*a</sup>

<sup>a</sup> State Key Laboratory of Structure Chemistry, Fujian Institute of Research on the Structure of Matter, Chinese Academy of Sciences, Fuzhou, 350002, China.

<sup>b</sup> Graduate School of the Chinese Academy of Sciences, Beijing, 100049, China.

- Corresponding author:

E-mail: *wxt@fjirsm.ac.cn*.

Tel: +86-591-83719238; Fax: +86-591-83719238

## Materials and Methods:

All reagents and solvents used were received from commercial suppliers without further purification. Elemental analyses (C, H, and N) were performed with a Vario MICRO CHNOS elemental analyzer. The infrared spectra with KBr pellet were recorded in the range of 4000–400  $\text{cm}^{-1}$  on a Perkin-Elmer Spectrum One FT-IR spectrometer. Thermal analyses were performed on a NETZSCH STA 449C instrument from room temperature to 800 °C with a heating rate of 10 °C  $\text{min}^{-1}$  under nitrogen flow.  $^1\text{H}$  NMR was done on a Bruker AVANCE III spectrometer at 400 MHz. The ESI-MS spectrum was obtained from DECAX-30000 LCQ Deca XP mass spectrometer. The solid-state luminescence emission/excitation spectra were recorded on a FLS920 fluorescence spectrophotometer equipped with a continuous Xe-900 xenon lamp and a  $\mu\text{F}900$  microsecond flash lamp. For low-temperature measurements, microcrystal samples were mounted on a closed cycle helium cryostat. Powder X-ray diffraction (PXRD) data were collected on a DMAX-2500 diffractometer with Cu  $\text{K}\alpha$ . The calculated patterns were generated with PowderCell.

## Synthesis:

The ligand *N,N',N''*-1,3,5-triazine-2,4,6-triyltris(4-aminomethylbenzoic acid) ( $\text{H}_3\text{TTAA}$ ) was synthesized according to the method described in the literature.<sup>[1]</sup>

***N,N',N''*-1,3,5-triazine-2,4,6-triyltris(4-aminomethylbenzoic acid) ( $\text{H}_3\text{TTAA}$ ).** A solution of 4-aminomethylbenzoic acid (9.82 g, 65 mm) and sodium hydroxide (5.60 g, 140 mm) in 100 ml water was added dropwise into cyanuric chloride (3.69 g, 20mm) in 100ml water at 0-5 °C under stirring. After 3 h, the mixture was warmed to room temperature and reacted under stirring for 3 h. And then the mixture was allowed to reflux at 105 °C for another 6 hours. After cooling, the pH value was adjusted to about 3 using concentrated HCl. The white solid was collected by filtration, washed with alcohol and water and dried under vacuum at 60 °C in 86% yield.  $^1\text{H}$  NMR (400 MHz, DMSO):  $\delta$  3.40 (s, 3H), 4.41 (p, 6H), 7.34 (p, 6H), 7.85(p, 6H). Elemental analysis calcd for  $\text{H}_3\text{TTAA}$  ( $\text{C}_{27}\text{H}_{24}\text{N}_6\text{O}_6$ ): C 61.36, H 4.58, N 15.90;

found: C 60.81, H 4.46, N 15.50. ESI-MS:  $m/z$  527.6 ( $[M-H]^+$ , 100%, calcd 527.5).  
The IR spectrum of H<sub>3</sub>TTAA is shown in **Fig S9**.

**{(H<sub>2</sub>NMe<sub>2</sub>)[Cd(TTAA)]}·2H<sub>2</sub>O (1)**. A mixture of H<sub>3</sub>TTAA (106 mg, 0.20 mmol) and Cd(NO<sub>3</sub>)·4H<sub>2</sub>O (123 mg, 0.40 mmol) in 12 ml DMF, ethanol and water (v/v/v = 6:1:1) was sealed in a 23 ml Teflonlined autoclave and heated at 120 °C for 3 d, then cooled to room temperature at a rate of 5 °C/h. The resultant colorless block crystals were separated by filtration, washed with DMF to give the pure sample. (yield: ca. 86% based on H<sub>3</sub>TTAA). Anal. Calcd for CdC<sub>29</sub>H<sub>33</sub>N<sub>7</sub>O<sub>8</sub>: C, 48.38; H, 4.62; N, 13.62; found: C, 48.49; H, 4.94, N, 14.14 %. The IR spectrum of **1** is shown in **Fig S9**.

**{(H<sub>2</sub>NMe<sub>2</sub>)[Cd(TTAA)]}·H<sub>2</sub>O (2)**. A mixture of H<sub>3</sub>TTAA (106 mg, 0.20 mmol), Cd(NO<sub>3</sub>)·4H<sub>2</sub>O (123 mg, 0.40 mmol) and 4,4'-bipy (39 mg, 0.25 mmol) in 12 ml DMF, ethanol and water (v/v/v = 6:1:1) was sealed in a 23 ml Teflonlined autoclave and heated at 120 °C for 3 d, then cooled to room temperature at a rate of 5 °C/h. The resultant colorless octahedral crystals were separated by filtration, washed with DMF to give the pure sample. (yield: ca. 74% based on H<sub>3</sub>TTAA). Anal. Calcd for CdC<sub>29</sub>H<sub>31</sub>N<sub>7</sub>O<sub>7</sub>: C, 49.62; H, 4.45; N, 13.97; found: C, 49.52; H, 4.66, N, 13.68%. The IR spectrum of **2** is shown in **Fig S9**.

### Crystallographic Analyses:

The structural determination of single crystal was performed on Rigaku Mercury CCD diffractometer with graphite-monochromated Mo K $\alpha$  ( $\lambda = 0.71073$  Å) radiation at room temperature. The structures were solved by direct methods and refined by the full-matrix least-squares technique on  $F^2$  using the SHELXTL-97 program.<sup>[2]</sup> All non-hydrogen atoms were refined with anisotropic displacement parameters. The positions of hydrogen atoms attached to carbon and nitrogen atoms were generated geometrically (C-H bond fixed at 0.97 Å). Crystallographic data and structure determination summaries are listed in Table S1. And the selected bond lengths and angles of the complexes are listed in Table S2-S3.

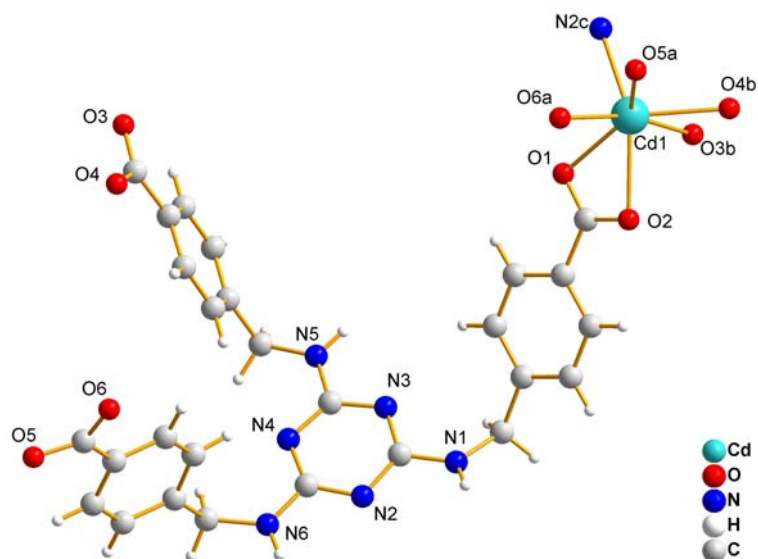

**Fig. S1** Coordination environment of the Cd(II) ion in framework **1**. Symmetry codes for the generate atoms: a, 1-x, -y, -z; b, x, 0.5-y, -0.5+z; c, x, 1+y, z.

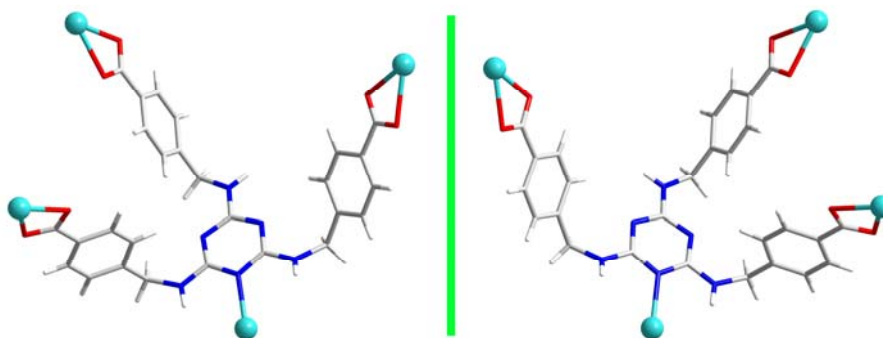

**Fig. S2** An enantiometric pair of ligands are formed in framework **1**.

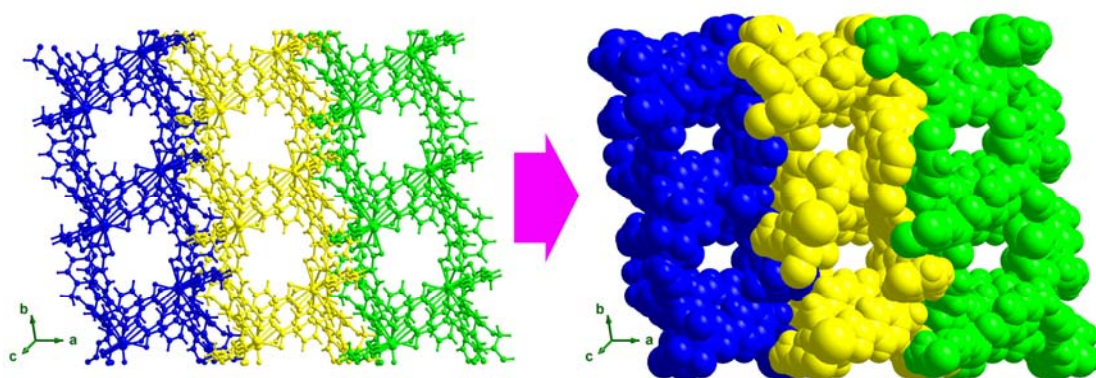

**Fig. S3** Ball-and-stick and space-filling representations of selected three layers in framework **1** with inter-immersion arrangement.

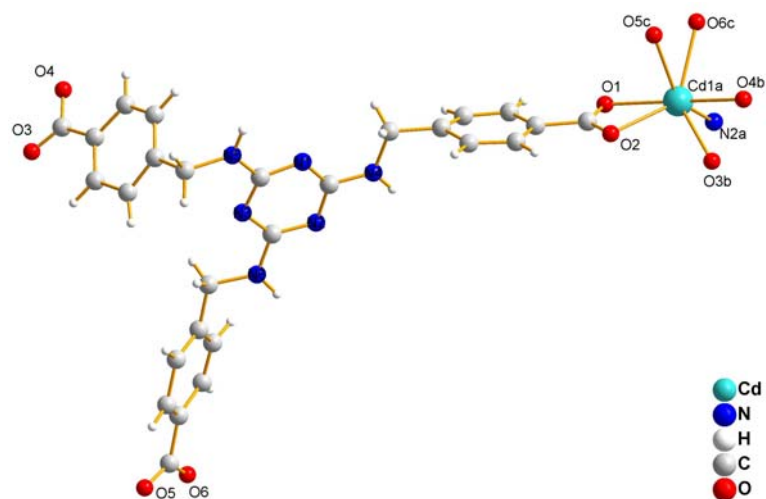

**Fig. S4** Coordination environment of the Cd(II) ion in framework **2**. Symmetry codes for the generate atoms: a,  $-x, 1-y, -z$ ; b,  $-0.5+x, -0.5+y, -1+z$ ; c,  $-0.5+x, 0.5+y, -1+z$ .

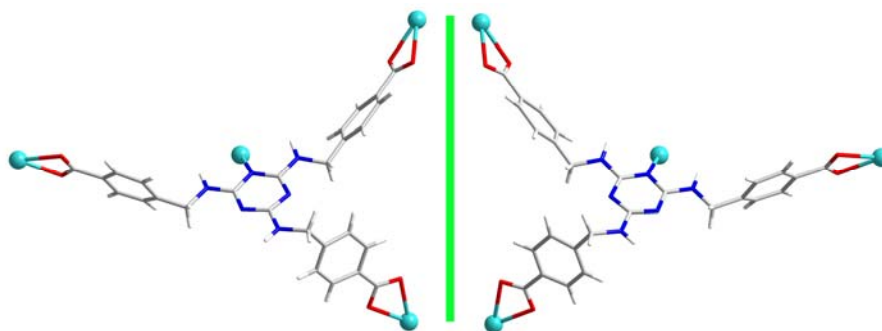

**Fig. S5** An enantiomeric pair of ligands are formed in framework **2**.

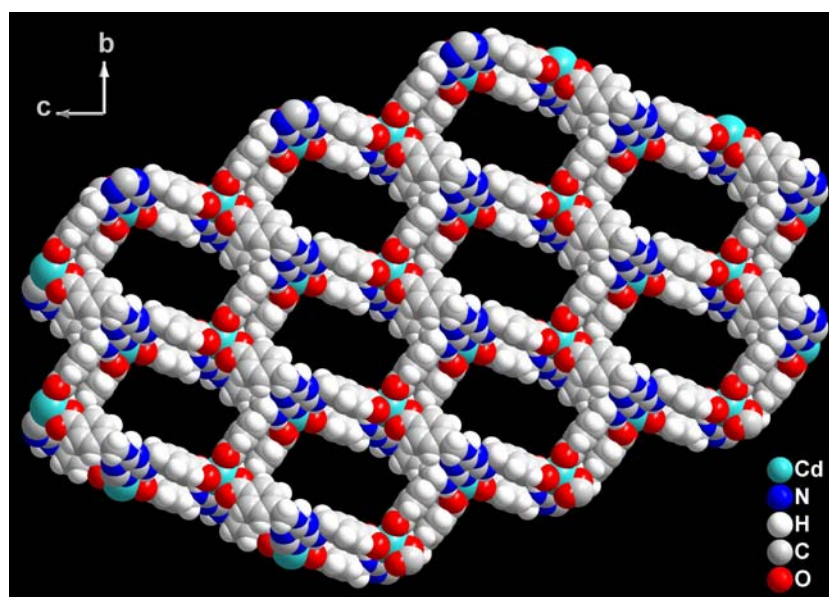

**Fig. S6** Space-filling representation of single layer with large cavities in framework **2**.

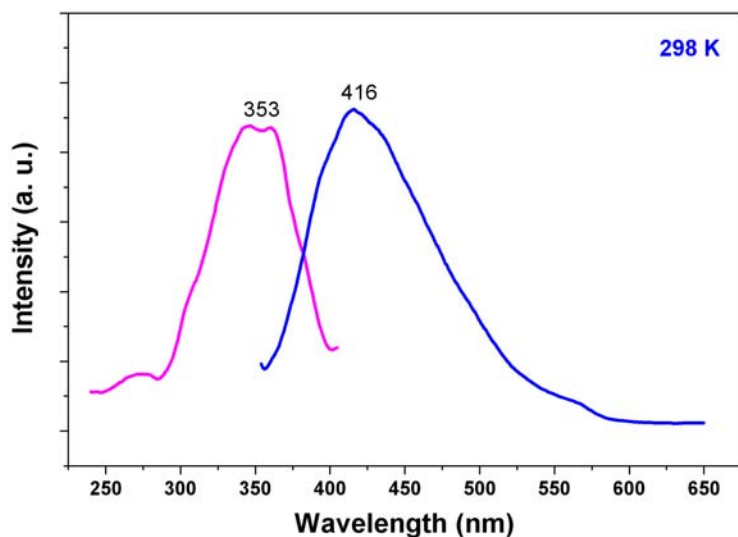

Fig. S7 Excitation and emission spectra of H<sub>3</sub>TTAA in the solid state at room temperature.

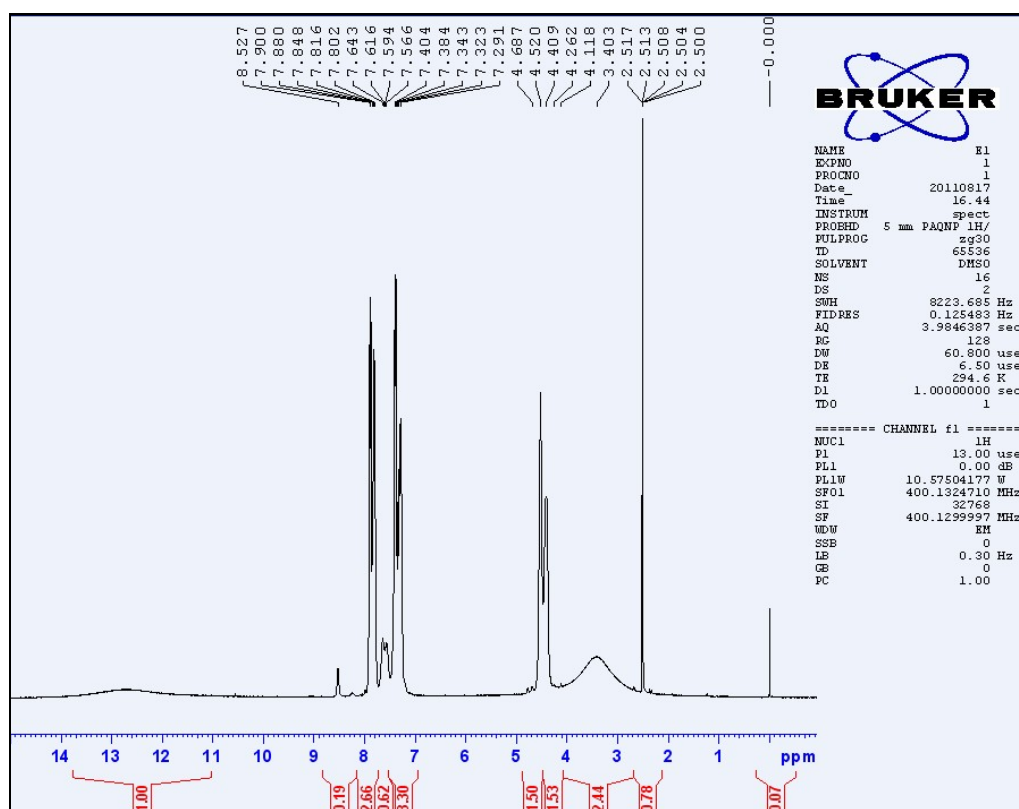

Fig. S8 <sup>1</sup>HMR spectrum of H<sub>3</sub>TTAA in DMSO.

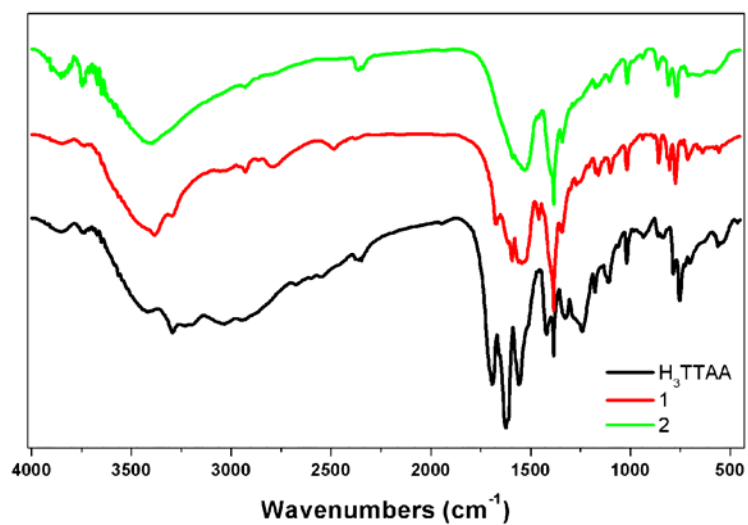

**Fig. S9** IR spectra of H<sub>3</sub>TTAA, **1** and **2**.

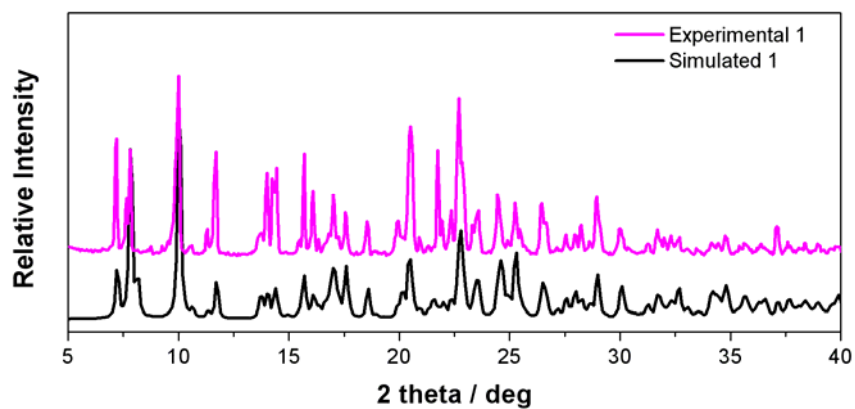

**Fig. S10** Powder X-ray diffractions for simulated and experimental **1**.

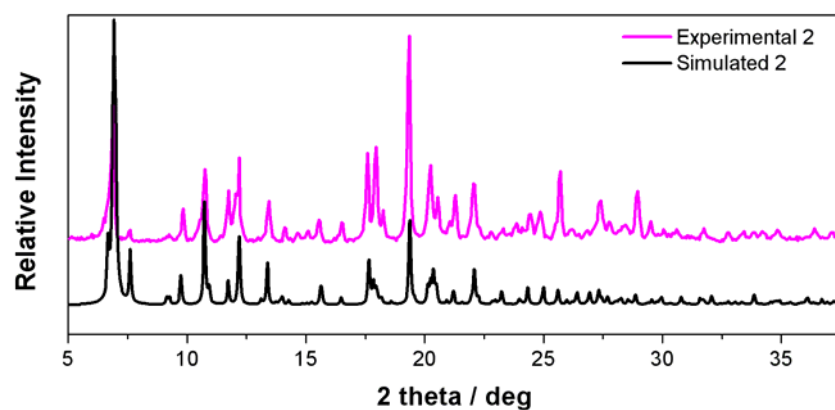

**Fig. S11** Powder X-ray diffractions for simulated and experimental **2**.

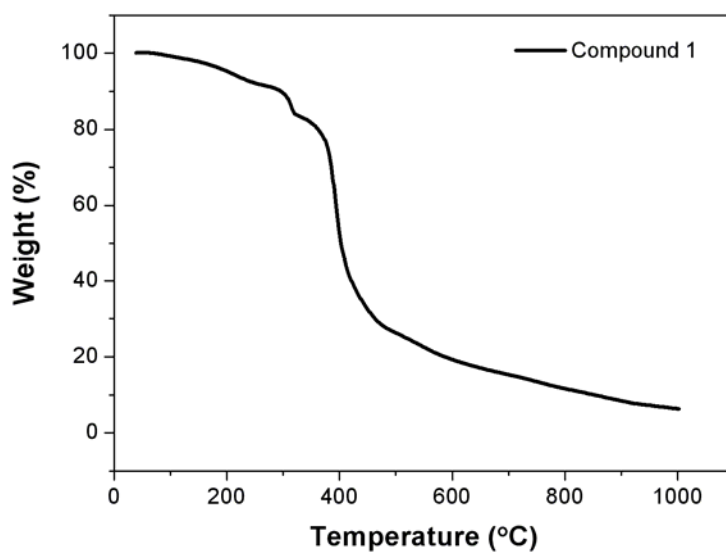

**Fig. S12** TGA curve of compound 1.

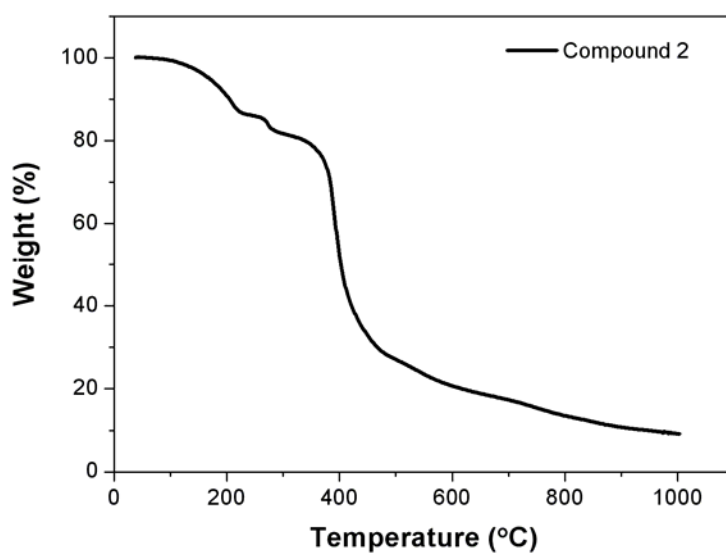

**Fig. S13** TGA curve of compound 2.



**Table S1.** Crystal Data and Structure Refinements for **1** and **2**

| Compound                                                                                                                                              | <b>1</b>                                                        | <b>2</b>                                                        |
|-------------------------------------------------------------------------------------------------------------------------------------------------------|-----------------------------------------------------------------|-----------------------------------------------------------------|
| Formula                                                                                                                                               | CdC <sub>29</sub> H <sub>33</sub> N <sub>7</sub> O <sub>8</sub> | CdC <sub>29</sub> H <sub>31</sub> N <sub>7</sub> O <sub>7</sub> |
| FW                                                                                                                                                    | 719.77                                                          | 702.01                                                          |
| Temperature                                                                                                                                           | 293 K                                                           | 293 K                                                           |
| Cryst syst                                                                                                                                            | monoclinic                                                      | monoclinic                                                      |
| Space group                                                                                                                                           | <i>P2</i> <sub>1</sub> / <i>c</i>                               | <i>C2</i> / <i>c</i>                                            |
| <i>a</i> (Å)                                                                                                                                          | 12.943(4)                                                       | 29.28(2)                                                        |
| <i>b</i> (Å)                                                                                                                                          | 12.329(3)                                                       | 14.524(10)                                                      |
| <i>c</i> (Å)                                                                                                                                          | 23.867(5)                                                       | 20.084(15)                                                      |
| $\alpha$ (deg)                                                                                                                                        | 90                                                              | 90                                                              |
| $\beta$ (deg)                                                                                                                                         | 108.881(12)                                                     | 115.414(11)                                                     |
| $\gamma$ (deg)                                                                                                                                        | 90                                                              | 90                                                              |
| <i>V</i> (Å <sup>3</sup> )                                                                                                                            | 3603.6(16)                                                      | 7714(10)                                                        |
| <i>Z</i>                                                                                                                                              | 4                                                               | 8                                                               |
| <i>D</i> <sub>c</sub> (g cm <sup>-3</sup> )                                                                                                           | 1.327                                                           | 1.209                                                           |
| $\mu$ (mm <sup>-1</sup> )                                                                                                                             | 0.658                                                           | 0.612                                                           |
| Reflns colld                                                                                                                                          | 27237                                                           | 25354                                                           |
| Unique reflns<br>( <i>R</i> <sub>int</sub> )                                                                                                          | 7817 (0.0346)                                                   | 8737 (0.0666)                                                   |
| <i>S</i> on <i>F</i> <sup>2</sup>                                                                                                                     | 0.975                                                           | 1.104                                                           |
| <i>R</i> 1, <sup>a</sup> <i>wR</i> 2 <sup>b</sup><br>[ <i>I</i> > 2 $\sigma$ ( <i>I</i> )]                                                            | 0.0522, 0.1645                                                  | 0.0758, 0.2071                                                  |
| <i>R</i> 1, <sup>a</sup> <i>wR</i> 2 <sup>b</sup><br>(all data)                                                                                       | 0.0587, 0.1723                                                  | 0.1219, 0.3054                                                  |
| <sup>a</sup> <i>R</i> 1 = $\sum( F_o  -  F_c ) / \sum  F_o $ . <sup>b</sup> <i>wR</i> 2 = $\{\sum w [(F_o^2 - F_c^2)] / \sum w [(F_o^2)^2]\}^{0.5}$ . |                                                                 |                                                                 |

**Table S2.** Selected Bond Lengths [Å] and Angles [°] for Compound **1**<sup>a</sup>

|             |            |             |            |             |            |
|-------------|------------|-------------|------------|-------------|------------|
| Cd1-N2c     | 2.320(3)   | Cd1-O1      | 2.336(3)   | Cd1-O2      | 2.436(3)   |
| Cd1-O4b     | 2.320(3)   | Cd1-O6a     | 2.345(3)   | Cd1-O3b     | 2.467(4)   |
| Cd1-O5a     | 2.488(4)   |             |            |             |            |
| N2c-Cd1-O4b | 103.37(11) | O4b-Cd1-O2  | 94.85(11)  | O2-Cd1-O3b  | 81.97(11)  |
| N2c-Cd1-O1  | 97.73(10)  | O1-Cd1-O2   | 55.24(10)  | N2c-Cd1-O5a | 88.97(13)  |
| O4b-Cd1-O1  | 134.74(11) | O6a-Cd1-O2  | 86.47(12)  | O4b-Cd1-O5a | 85.39(11)  |
| N2c-Cd1-O6a | 94.96(13)  | N2c-Cd1-O3b | 92.04(11)  | O1-Cd1-O5a  | 134.97(12) |
| O4b-Cd1-O6a | 134.36(13) | O4b-Cd1-O3b | 54.36(10)  | O6a-Cd1-O5a | 53.16(13)  |
| O1-Cd1-O6a  | 81.86(13)  | O1-Cd1-O3b  | 85.65(11)  | O2-Cd1-O5a  | 113.11(13) |
| N2c-Cd1-O2  | 152.54(10) | O6a-Cd1-O3b | 166.39(11) | O3b-Cd1-O5a | 138.81(11) |

<sup>a</sup>Symmetry codes: (a) -x+1,-y,-z; (b) x,-y+1/2,z-1/2; (c) x,y+1,z.

**Table S3.** Selected Bond Lengths [Å] and Angles [°] for Compound **2**<sup>a</sup>

|             |            |             |           |             |            |
|-------------|------------|-------------|-----------|-------------|------------|
| Cd1-N2      | 2.319(5)   | Cd1-O1a     | 2.355(5)  | Cd1-O5b     | 2.435(6)   |
| Cd1-O4c     | 2.324(6)   | Cd1-O2a     | 2.426(6)  | Cd1-O6b     | 2.450(5)   |
| Cd1-O3c     | 2.476(7)   |             |           |             |            |
| N2-Cd1-O4c  | 95.8(2)    | O4c-Cd1-O5b | 85.1(2)   | O5b-Cd1-O6b | 53.56(17)  |
| N2-Cd1-O1a  | 92.56(18)  | O1a-Cd1-O5b | 90.06(19) | N2-Cd1-O3c  | 96.2(2)    |
| O4c-Cd1-O1a | 171.2(2)   | O2a-Cd1-O5b | 81.0(2)   | O4c-Cd1-O3c | 51.6(2)    |
| N2-Cd1-O2a  | 129.6(2)   | N2-Cd1-O6b  | 89.13(18) | O1a-Cd1-O3c | 124.6(2)   |
| O4c-Cd1-O2a | 117.1(3)   | O4c-Cd1-O6b | 83.3(2)   | O2a-Cd1-O3c | 79.0(2)    |
| O1a-Cd1-O2a | 54.65(18)  | O1a-Cd1-O6b | 99.77(17) | O5b-Cd1-O3c | 112.8(2)   |
| N2-Cd1-O5b  | 142.43(19) | O2a-Cd1-O6b | 129.4(2)  | O6b-Cd1-O3c | 134.86(17) |

<sup>a</sup>Symmetry codes: (a) -x,-y+1,-z; (b) -x+1/2,-y+1/2,-z+1; (c) -x+1/2,-y+3/2,-z+1.

- [1] Q.-L. Zhu, T.-L. Sheng, R.-B. Fu, S.-M. Hu, J.-S. Chen, S.-C. Xiang, C.-J. Shen and X.-T. Wu, *Cryst. Growth Des.*, 2009, **9**, 5128.  
[2] *SHELXTL*, version 5.10; Siemens Analytical X-ray Instruments Inc.: Madison, WI, **1994**.
